# Supplementary material
Source: PubMed Central journal article supplement (PMC5822207)
Supplement: jamaneurol-74-525-s001.pdf [file jamaneurol-74-525-s001.pdf]

## Supplementary Online Content

Gaiani A, Martinelli I, Bello L, et al. Diagnostic and prognostic biomarkers in amyotrophic lateral sclerosis: neurofilament light chain levels in definite subtypes of disease. *JAMA Neurol*. Published online March 6, 2017. doi:10.1001/jamaneurol.2016.5398

**eFigure 1.** Natural Logarithm Transformation of CSF NFL Concentration With Subsequent Normal Distribution of Data

**eFigure 2.** ROC Curves of NFL Concentrations for Discrimination Between ALS and Controls/FTD/MN, Between ALS and Controls, and Between ALS and MN/FTD

**eFigure 3.** Effect of Time From Onset to Lumbar Puncture on the Concentration of NFL in the ALS Group

**eFigure 4.** Effect of Disease Progression Rate From Onset to Lumbar Puncture ( $\Delta$ FS) on NFL Concentration in the ALS Group

**eFigure 5.** ALSFRS-R (A-B-C-D) and MITOS (E-F-G-H) Change Relative to Time (Months From Lumbar Puncture) by Subtypes

**eTable.** Characteristics of the ALS Group

This supplementary material has been provided by the authors to give readers additional information about their work.

**eFigure 1.** Natural Logarithm Transformation of CSF NFL Concentration With Subsequent Normal Distribution of Data

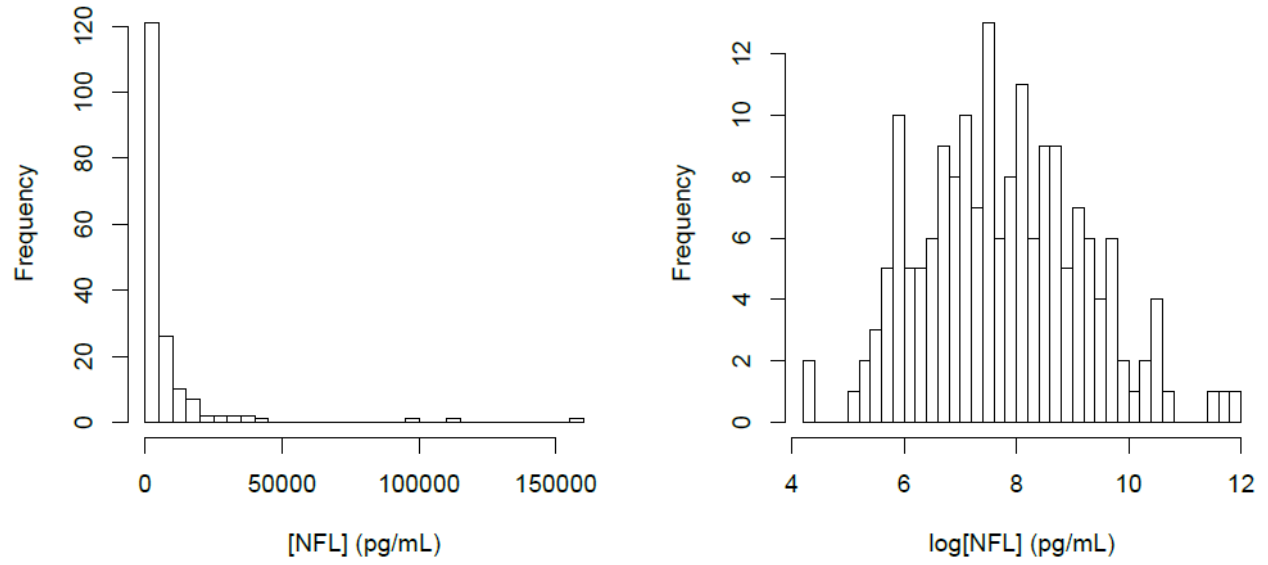

**eFigure 2.** ROC Curves of NFL Concentrations for Discrimination Between ALS and Controls/FTD/MN, Between ALS and Controls, and Between ALS and MN/FTD

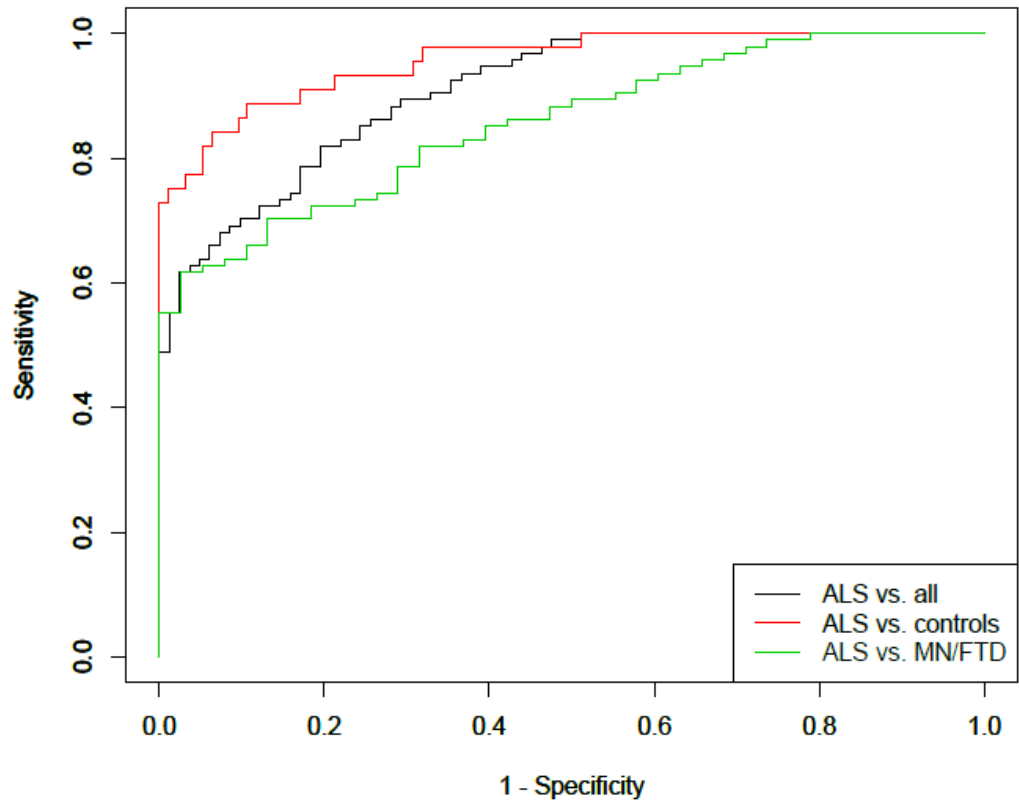

**eFigure 3.** Effect of Time From Onset to Lumbar Puncture on the Concentration of NFL in the ALS Group

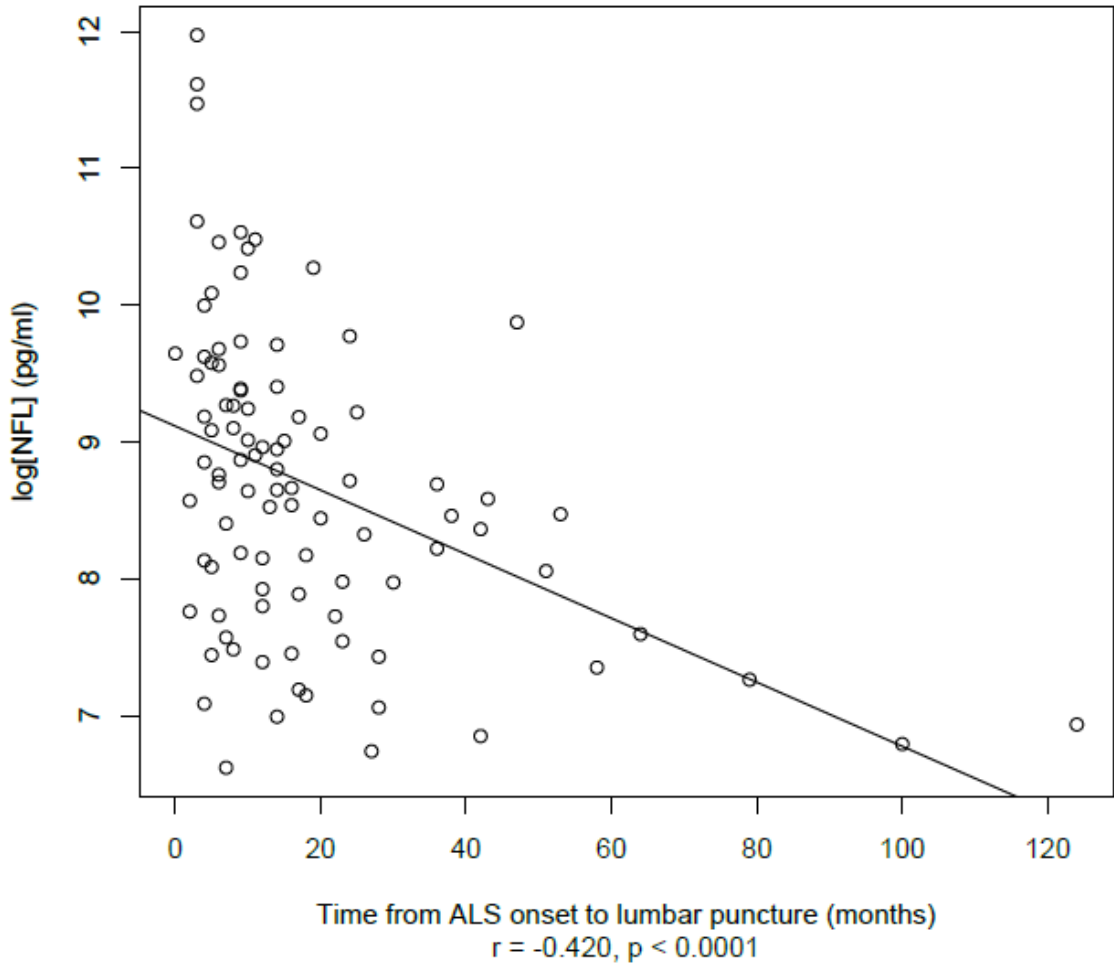

**eFigure 4.** Effect of Disease Progression Rate From Onset to Lumbar Puncture ( $\Delta$ FS) on NFL Concentration in the ALS Group

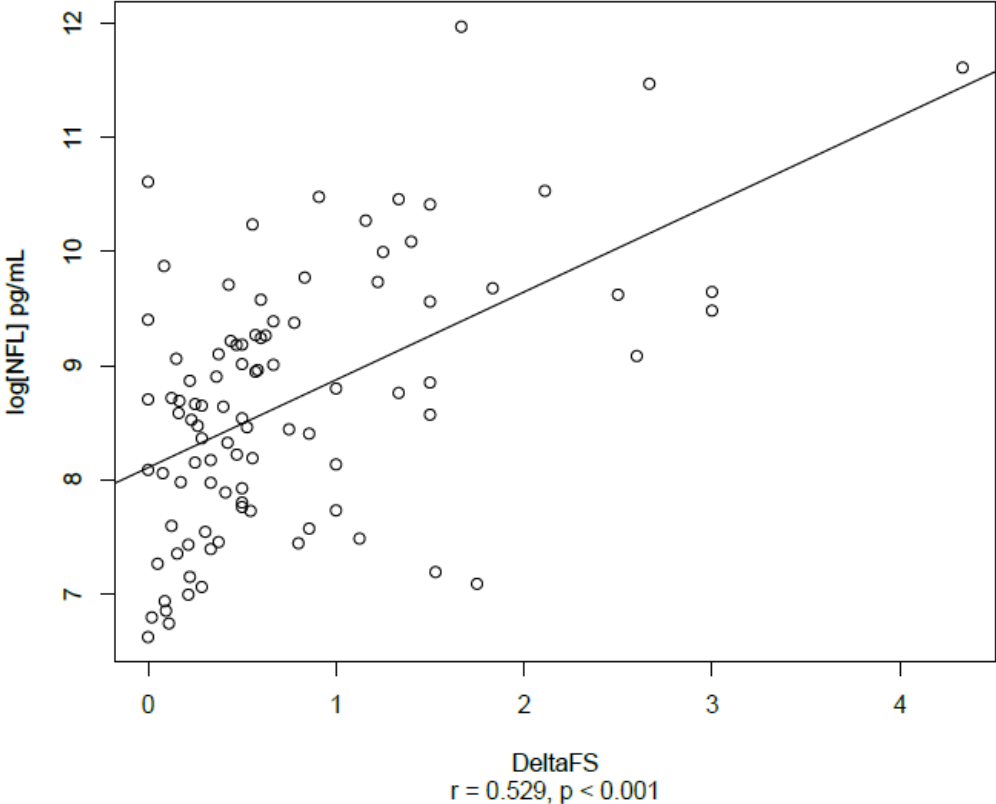

**eFigure 5.** ALSFRS-R (A-B-C-D) and MITOS (E-F-G-H) Change Relative to Time (Months From Lumbar Puncture) by Subtypes

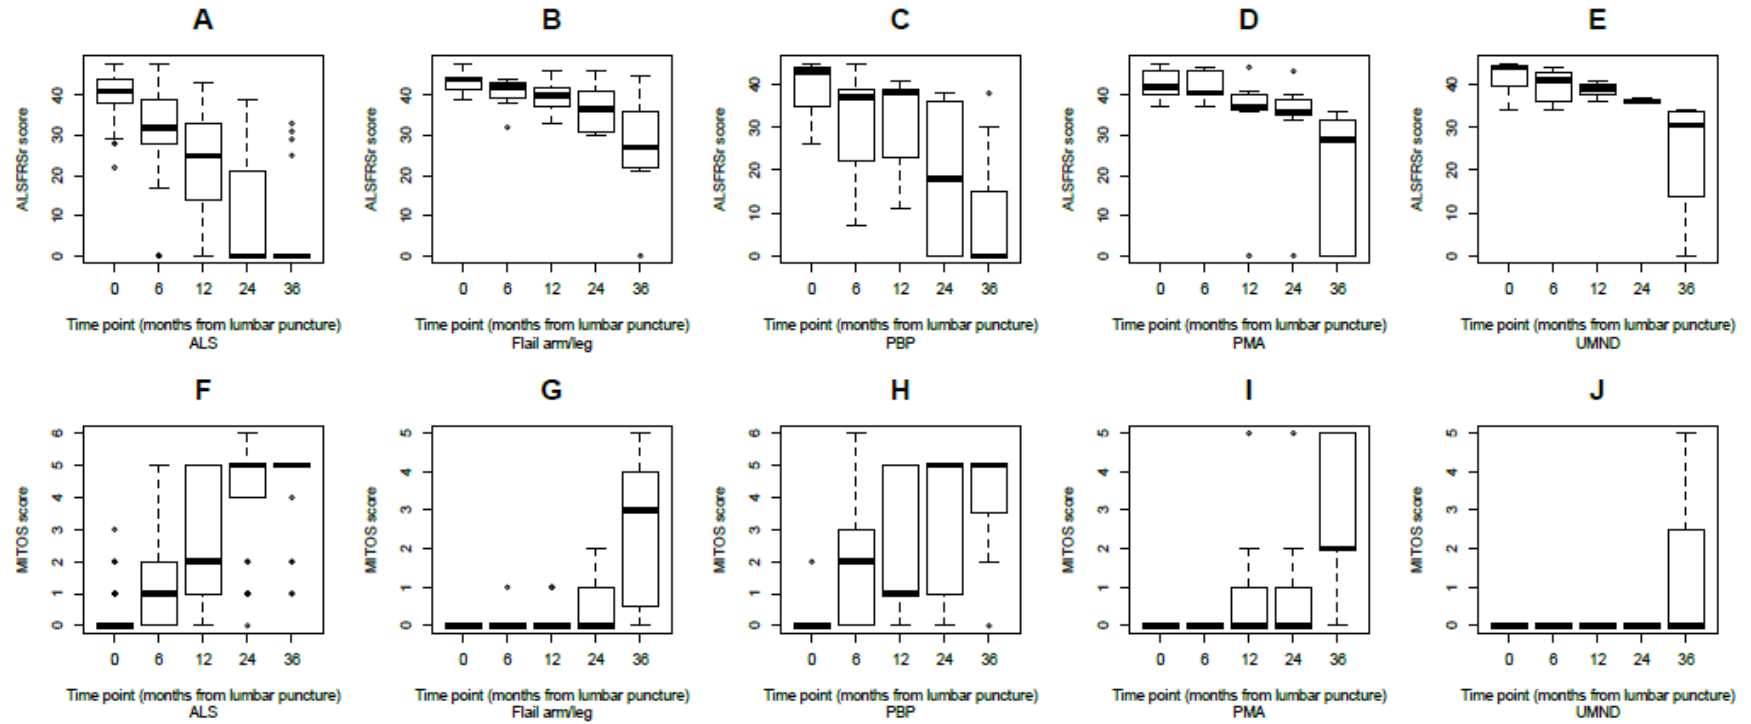

**eTable.** Characteristics of the ALS Group

|                               |                |             |
|-------------------------------|----------------|-------------|
| <b>Subtype of ALS</b>         | Typical ALS    | 57          |
|                               | Flail Arm/Leg  | 11          |
|                               | PMA            | 10          |
|                               | PBP            | 9           |
|                               | UMND           | 7           |
| <b>Gender</b>                 | female         | 30          |
|                               | male           | 64          |
| <b>CI*</b>                    | yes            | 13          |
|                               | no             | 81          |
| <b>Genetic ALS**</b>          | yes            | 8           |
|                               | no             | 82          |
|                               | NA             | 4           |
| <b>Age at onset</b>           | -              | 62 (52-68)  |
| <b>Disease duration at T0</b> | -              | 12 (6-22.8) |
| <b>ALSFRS-r</b>               | $\Delta$ FS*** | 0.5 (0.2-1) |
|                               | baseline (CSF) | 42 (39-44)  |
|                               | 6 months       | 37 (28-42)  |
|                               | 12 months      | 33 (23-39)  |
|                               | 24 months      | 23 (0-36)   |
|                               | 36 months      | 0 (0-28)    |
| <b>MITOS</b>                  | baseline (CSF) | 0 (0-0)     |
|                               | 6 months       | 0 (0-2)     |
|                               | 12 months      | 1 (0-3)     |
|                               | 24 months      | 3 (0-5)     |
|                               | 36 months      | 5 (2-5)     |

**Median and interquartile range are shown for quantitative variables.**
